# Supplementary material for: Ubiquitin Linkage-Specific Affimers Reveal Insights into K6-Linked Ubiquitin Signaling
Source: PubMed Central journal article supplement (PMC5640506; doi:10.1016/j.molcel.2017.08.020), 2017-10-05
Supplement: mmc1.pdf [file mmc1.pdf]

**Molecular Cell, Volume 68**

**Supplemental Information**

**Ubiquitin Linkage-Specific Affimers Reveal  
Insights into K6-Linked Ubiquitin Signaling**

**Martin A. Michel, Kirby N. Swatek, Manuela K. Hospenthal, and David Komander**

Figure S1

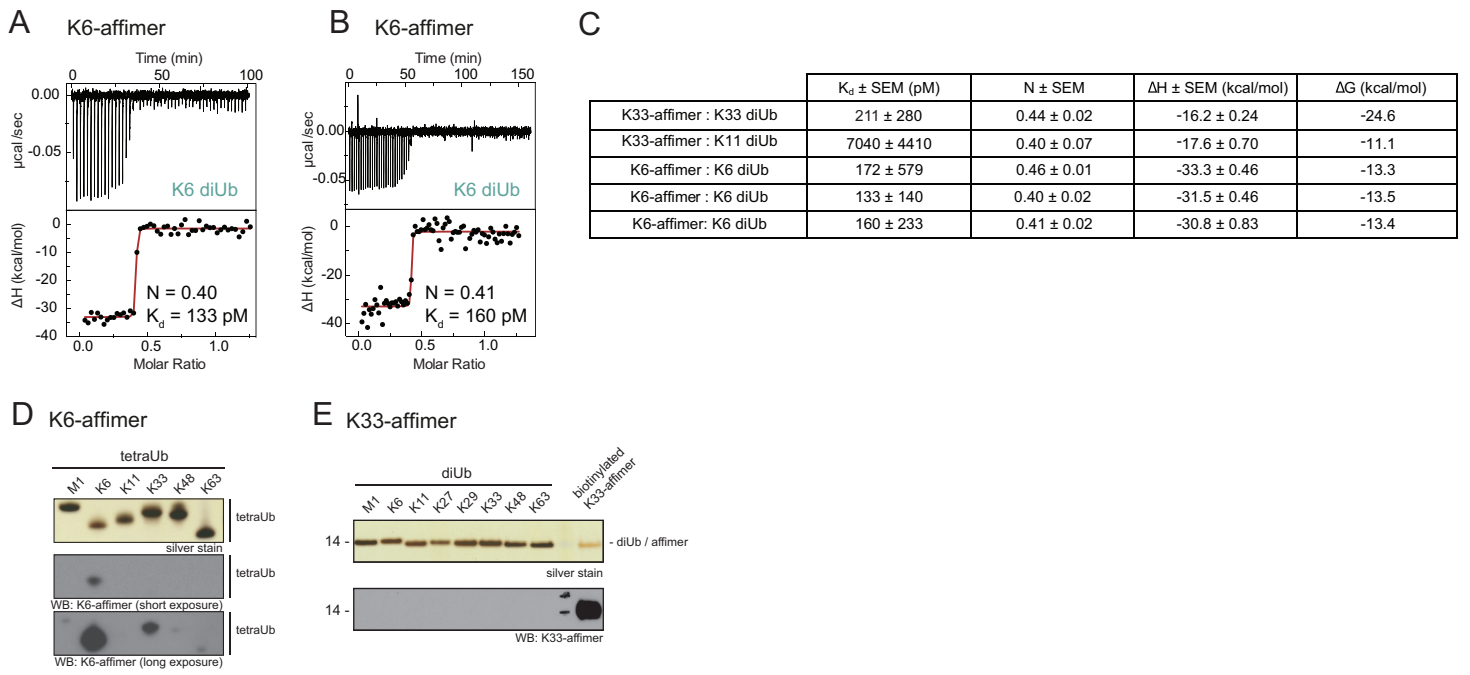

18 **Supplementary Figure Legends**

19 **Figure S1 (related to Figure 1): Linkage-specificity of affimers**

20 **A-B)** ITC curves of K6-affimer (5  $\mu\text{M}$ , in cell) binding to K6 diUb (30  $\mu\text{M}$ , in syringe)  
21 with A) 49 x 0.5  $\mu\text{L}$  and B) 79 x 0.5  $\mu\text{L}$  injections, respectively. Plots for raw heat (*top*)  
22 and derived isotherms (*bottom*) with fits (red) are shown. **C)** Table for best-fit  
23 parameters for ITC experiments from Figure 1 and S1. **D)** Western blot of the K6-  
24 affimer against differently linked tetraUb chains. **E)** Western blot with the biotinylated  
25 K33-affimer against differently linked diUb. Biotinylated K33-affimer was also loaded  
26 onto the gel as a technical control for detection with Streptavidin-HRP.

Figure S2

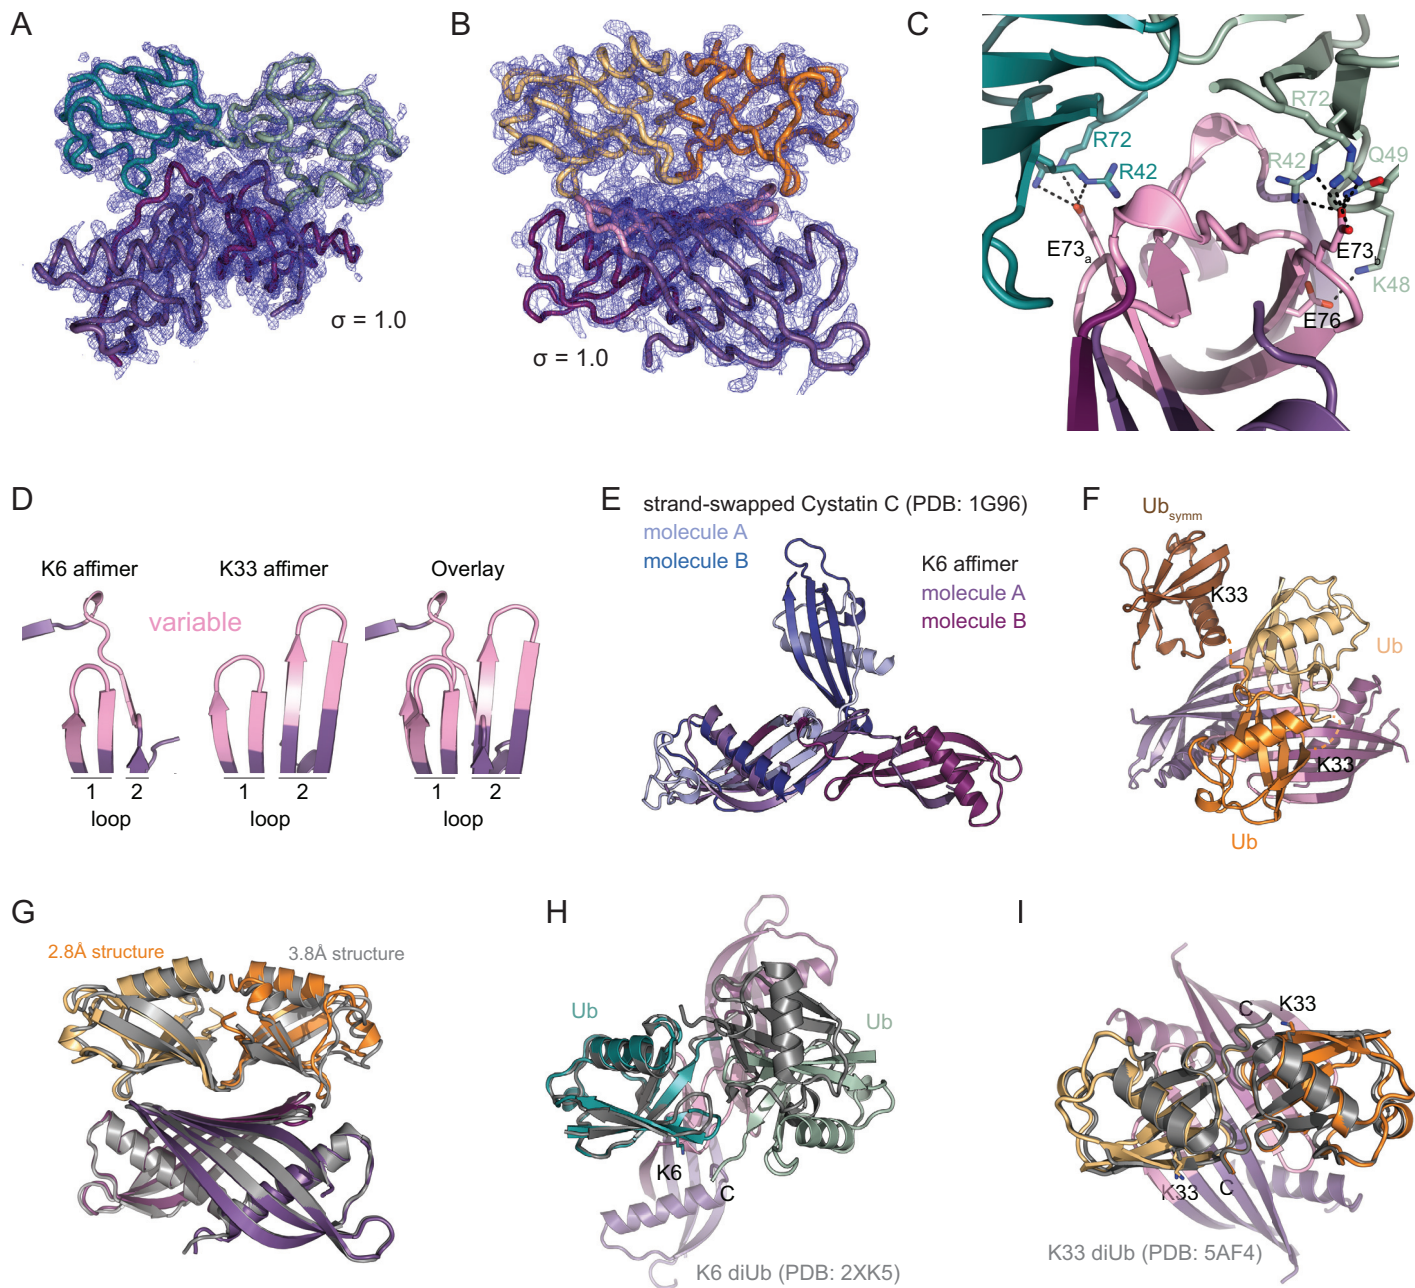

27 **Figure S2 (related to Figure 2): Structures of linkage-specific affimers with their**  
28 **cognate diUbs**

29 **A)** Structure of K6-affimer bound to K6 diUb with corresponding  $2 |F_o| - |F_c|$  electron  
30 density map, contoured at  $\sigma = 1.0$ . **B)** As in A, but for the K33-affimer:K33 diUb  
31 structure. **C)** Close up of charged interaction in the K6-affimer:K6 diUb structure,  
32 mediated by the variable region (pink) of the affimer. **D)** Variable loops (pink) of K6-  
33 and K33-affimers, and in overlay, showing the difference in secondary structure. **E)**  
34 Overlay of the strand-swapped K6-affimer (orange) with naturally occurring human  
35 cystatin C (blue, PDB: 1G96) that is also strand-swapped. Other naturally occurring  
36 cystatins engage in the strand swap in the same fashion as cystatin C, but the  
37 relative orientation of the two monomers differs. **F)** Symmetry-related molecules of  
38 the K33-affimer:K33 diUb structure showing how the bound chain can be extended.  
39 **G)** Overlay of the structure of the K33-affimer:K33 diUb in the  $H3$  space group ( $2.5\text{\AA}$ )  
40 and the  $P2_1$  space group ( $3.8\text{\AA}$ , grey). **H)** Overlay of the K6-affimer:K6 diUb structure  
41 with previously solved K6 diUb structure (grey, PDB: 2XEW), superimposed on the  
42 distal Ub. **I)** As in E, but for the K33-affimer:K33 diUb complex and K33 diUb (grey,  
43 PDB: 5AF4), respectively.

Figure S3

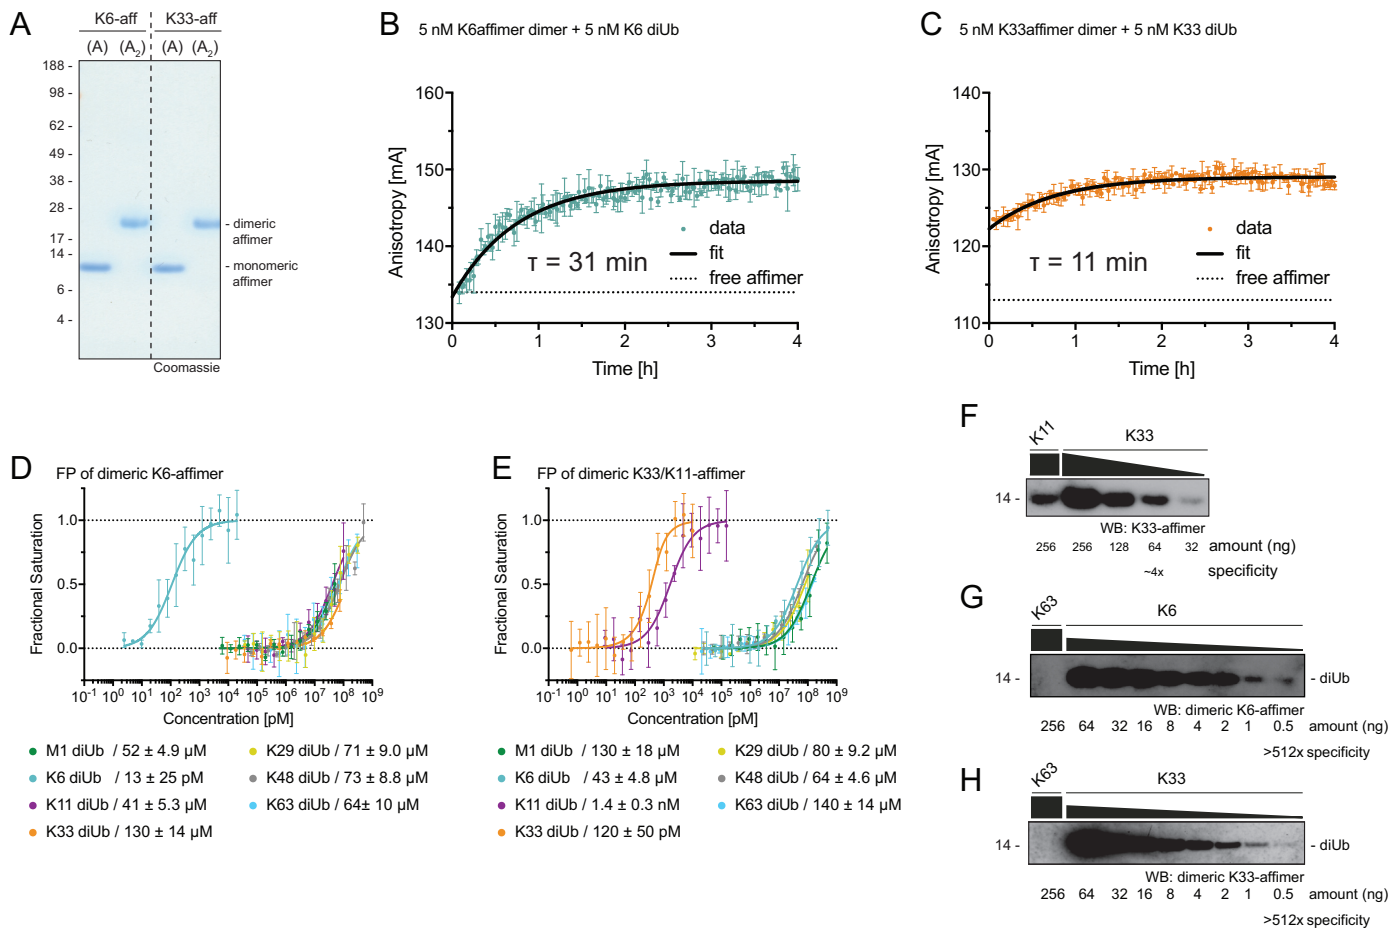

44 **Figure S3 (related to Figure 3): Affimers dimerize to achieve linkage-specificity**  
45 **A)** Coomassie-stained gel of monomeric and dimerized versions of K6- and K33/K11-  
46 affimers, respectively. **B)** Fluorescence anisotropy time course with 5 nM K6-affimer  
47 and 5 nM K6 diUb. The dotted line indicates the anisotropy value for free K6-affimer  
48 and the data was fitted using a simple one-phase association model. **C)** As in B but  
49 for the K33/K11-affimer. **D)** Fluorescence polarization (FP) binding assay for the K6-  
50 affimer binding to differently linked diUb fitted with a one-site binding model  
51 accounting for ligand depletion. **E)** As in D, but for the K33/K11-affimer. **F)** Western  
52 blot using the dimerized K6-affimer using the indicated amounts of K6 diUb or K63  
53 diUb .**G)** As in F, but probed with the dimerized K33/K11-affimer. **H)** Indicated  
54 amounts of K33 and K11 diUb were probed with the K33/K11-affimer by Western  
55 blotting. The specificity was estimated from relative signal strength and  
56 corresponding amounts loaded.

Figure S4

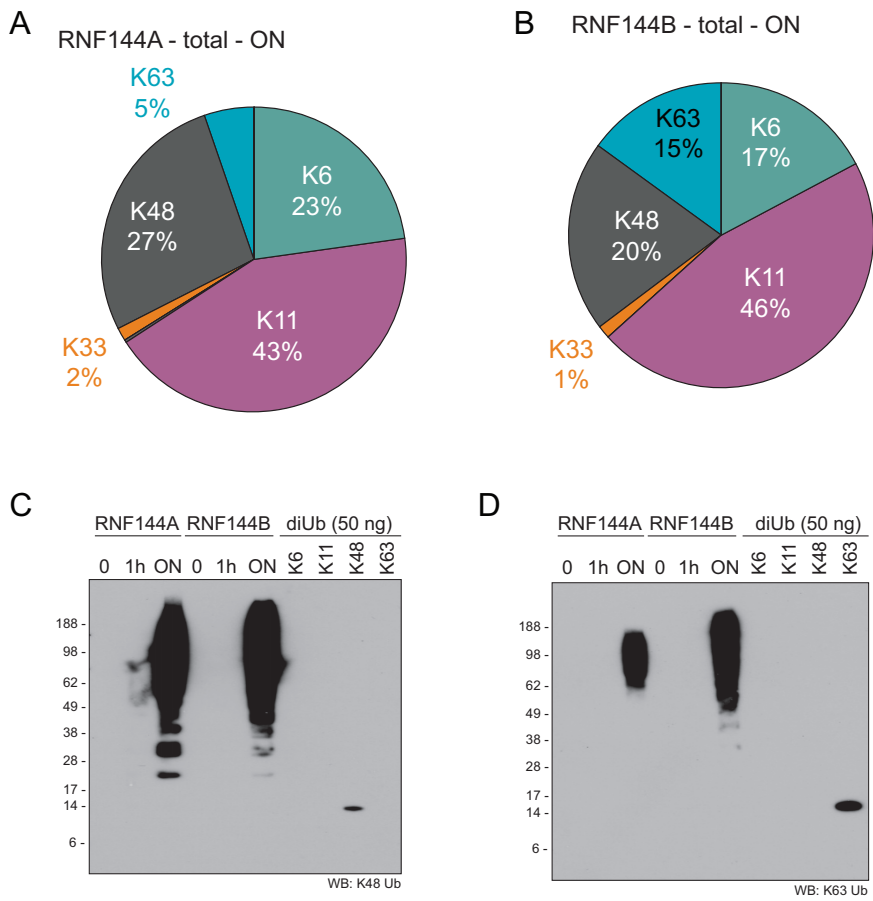



57 **Figure S4 (related to Figure 4): *In vitro* applications of Affimers**

58 **A-B)** AQUA-MS-derived Ub linkage composition for total assembly reaction of A)  
59 RNF144A and B) RNF144B after overnight assembly with UBE2L3 and Ub wt. **C-D)**  
60 *In vitro* assembly reaction of RNF144A and RNF144B with indicated amounts of  
61 recombinant diUb as in Figure 4D and probed with C) a K48-specific antibody or D) a  
62 K63-specific antibody. Longer chains are preferentially detected, probably due to  
63 avidity effects.

Figure S5

A

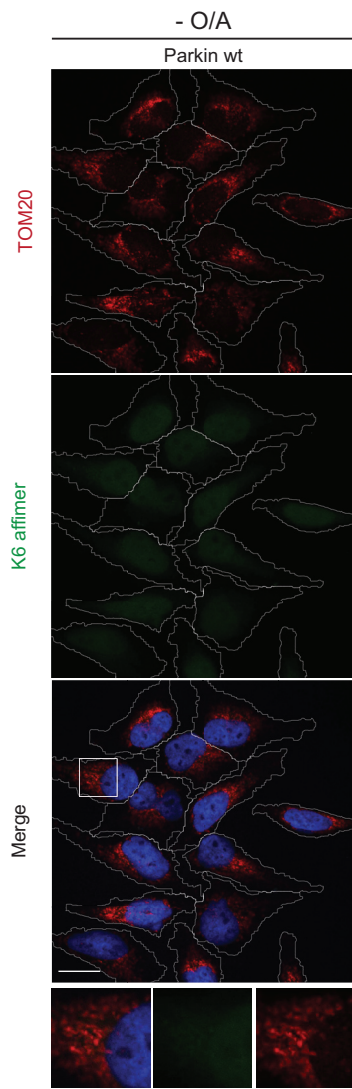

B

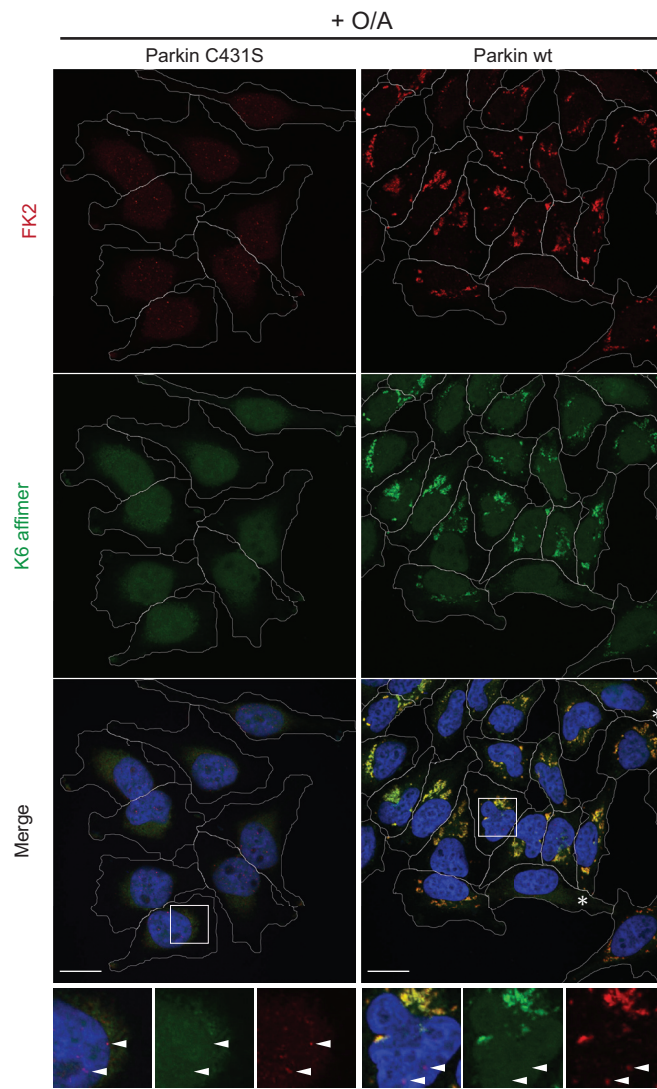

C

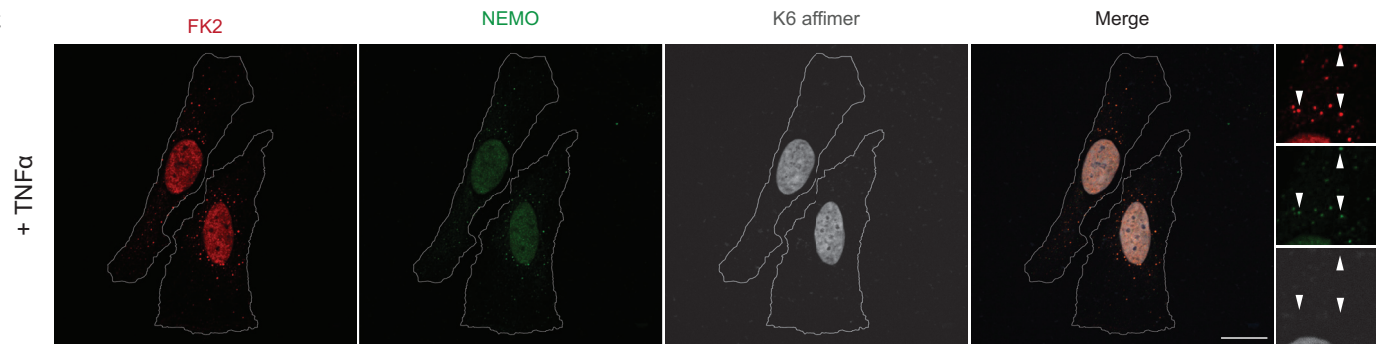

64 **Figure S5 (related to Figure 5): *In vivo* applications of Affimers**

65 **A)** Confocal fluorescence microscopy images as in Figure 5C of untreated HeLa cells  
66 expressing wt Parkin stained with TOM20 (red), K6-affimer (green) and DAPI (blue).  
67 Scale bars correspond to 20  $\mu$ m. **B)** As in A, but cells were treated with O/A and  
68 either wt Parkin or catalytically inactive (C431S) Parkin was expressed. Cells were  
69 stained with FK2 (red), K6-affimer (green) and DAPI (blue). Arrows indicate FK2-  
70 labelled ubiquitin conjugates that are not recognized by the K6-affimer. Not all cells  
71 seem to have ubiquitinated mitochondria (asterisks), either due to loss of Parkin  
72 expression, or because mitophagy was not induced. **C)** Confocal fluorescence  
73 microscopy images of cells that were treated with TNF $\alpha$  and stained with FK2 (red),  
74 NEMO (green), K6-affimer (grey) and DAPI (blue). NEMO-positive FK2 punctae are  
75 negative for the K6-affimer (white arrows) suggesting the affimer retains specificity in  
76 fluorescence staining of fixed cells.

Figure S6

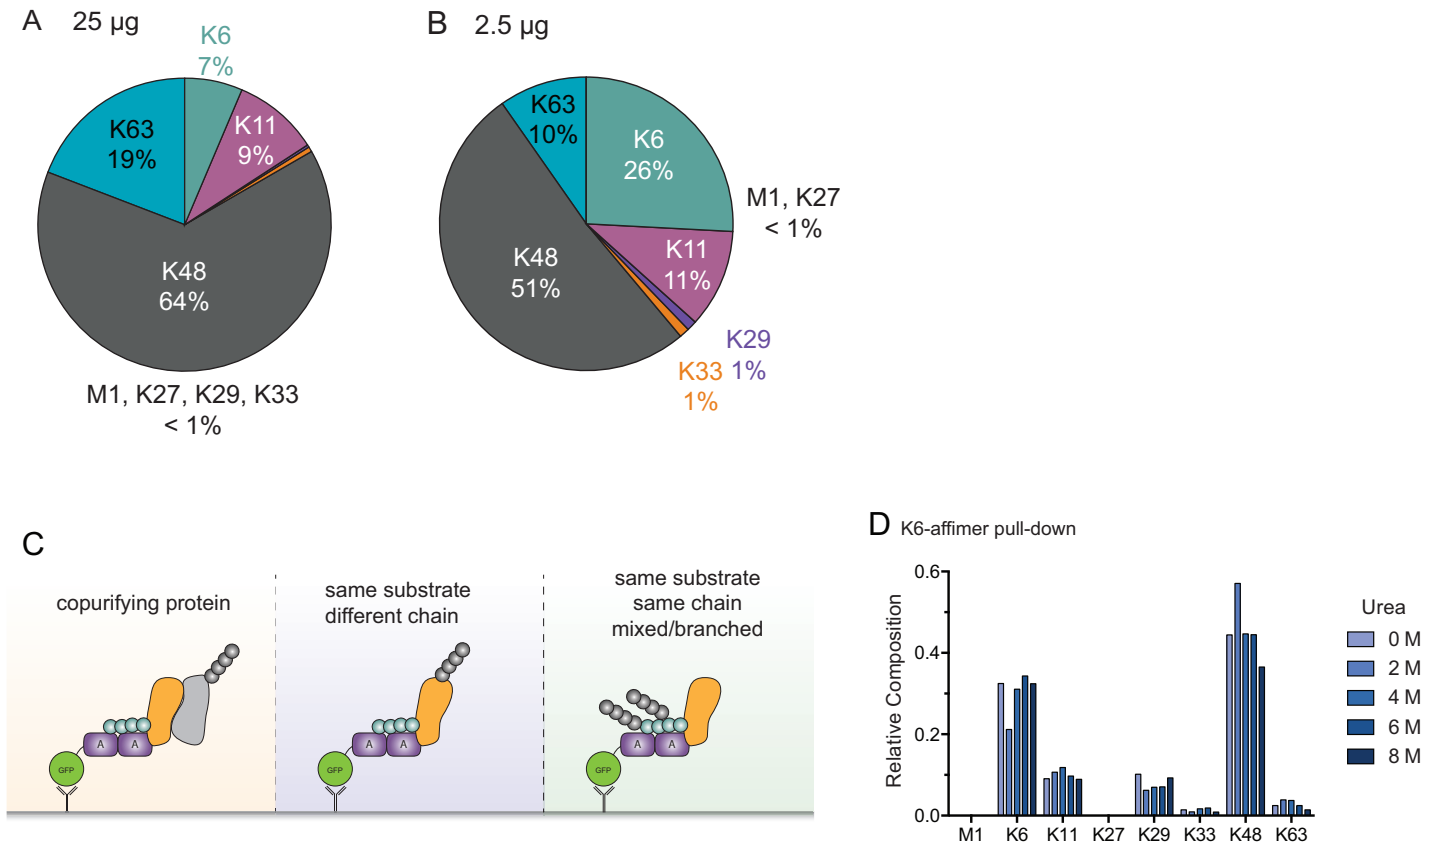

77 **Figure S6 (related to Figure 6): *Enriching Ub linkages using affimers***  
78 **A-B)** Ub linkage compositions from K6-affimer pull-downs performed with A) 25  $\mu$ g  
79 and B) 2.5  $\mu$ g of the K6-affimer. **C)** Schematic explaining the different scenarios likely  
80 explaining the origin of non K6-chains in K6-affimer pull-downs **D)** Relative Ub chain  
81 composition of K6-affimer pull-downs performed in the presence of the indicated  
82 concentrations of urea.

Figure S7

A

| HUWE1 (aa)                         | PSMs  |       |       |
|------------------------------------|-------|-------|-------|
|                                    | Rep 1 | Rep 2 | Rep 3 |
| IPIPLMDYILNVMK (762-775)           | -     | 1     | -     |
| FVESILSNNTDDHCQEFVNQK (776-797)    | 2     | -     | -     |
| MVNPTTVLESPHSLPAK (1209-1225)      | -     | 5     | 3     |
| WITPVLILLDFYEK (1582-1595)         | 5     | -     | -     |
| IQEILIQGLTEDMVTVLIR (1742-1760)    | 2     | -     | -     |
| SAATSGAGSSTTSGVVGSLGSR (1844-1865) | 21    | 6     | 6     |
| IVNQPSLFGSK (2256-2267)            | -     | 3     | 3     |
| LLGPSAAADILQLSSSLPQSR (2580-2601)  | 2     | -     | -     |
| LLVGNDVHIAR (2606-2618)            | 3     | -     | -     |
| AGSSTPGDAPPAVAEVQGR (2895-2903)    | 3     | 11    | 11    |
| LLSLISIALPENK (3456-3468)          | 15    | 9     | 5     |

B

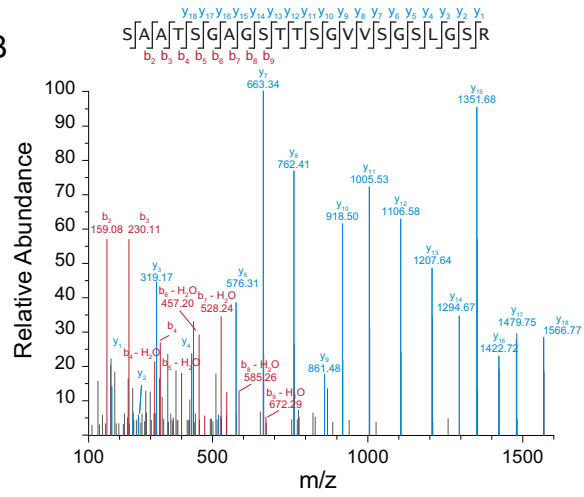

C

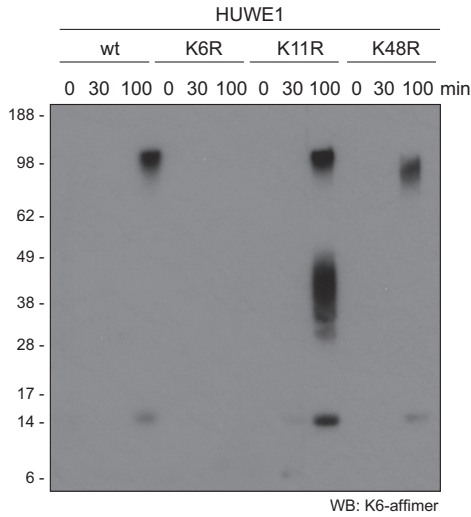

D HUWE1 total

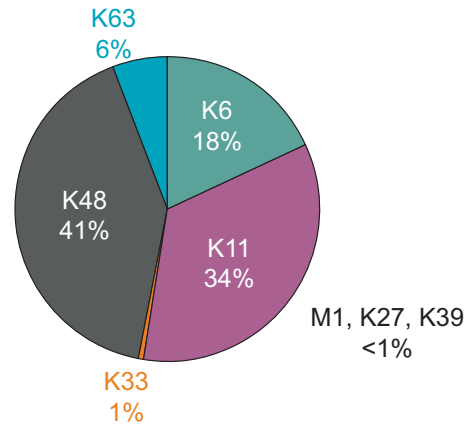

E data from Thompson et al., JBC, 2014

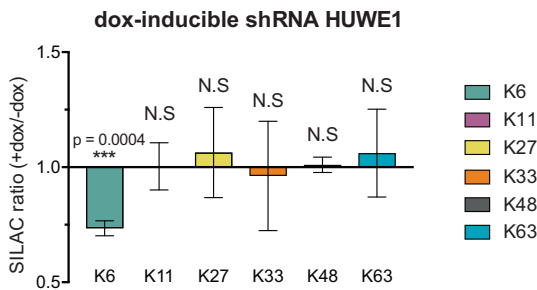

F

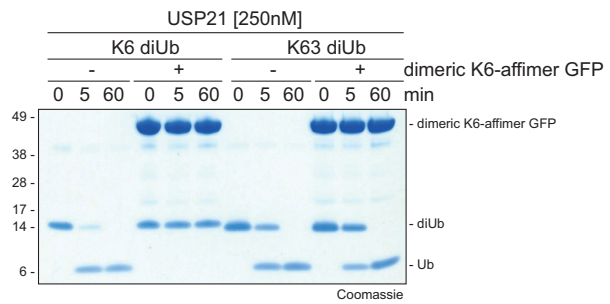

G

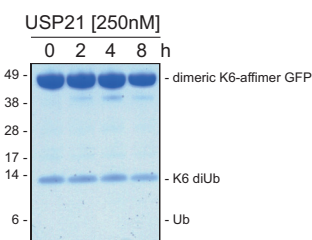

H

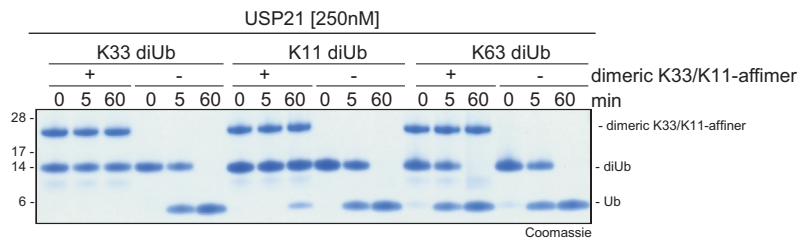

83

84 **Figure S7 (related to Figure 7): HUWE1 assembles K6 chains *in vitro* and *in***  
85 ***vivo***

86 **A)** Table summarizing the HUWE1 peptides identified in three replicate K6-affimer  
87 pull-down experiments with the corresponding number of PSMs. **B)** MS/MS  
88 fragmentation spectrum for one HUWE1 peptide (aa 1844-1865). **C)** Western blot  
89 with the K6-affimer of an assembly reaction with recombinant HUWE1 and different  
90 Ub mutants. **D)** Ub linkage composition of HUWE1-assembled Ub chains. **E)** SILAC  
91 ratios of induced vs. uninduced HUWE1 knockdown cell lines. Only singly modified  
92 peptides were analyzed. Data extracted and analyzed from Thompson et al., 2014.  
93 Error bars represent mean  $\pm$  standard deviation. \*\*\*  $p < 0.001$ ; N.S not significant as  
94 determined by a one sample, two-tailed *t* test. **F)** USP21 deubiquitinase assay in the  
95 presence or absence of GFP-tagged K6-affimer for K6 and K63 diUb. **G)** As in D, but  
96 with longer time points and only for K6 diUb. **H)** As in F but with K33/K11-affimer and  
97 for K33, K11 and K63 diUb.
